## **Topoisomerase II inhibitors induce cGAS-STING dependent inflammation resulting in cytokine induction and immune checkpoint activation**

Wilkinson, R. D. A.<sup>1</sup>, McCabe, N.<sup>1, 2</sup>, Parkes, E. E.<sup>1</sup>, Barros, E.M.<sup>1</sup>, Johnston, D. I.<sup>1</sup>, Ali, R.M.M.<sup>1</sup>, Lappin, K.<sup>1</sup>, Greenberg, R.A.<sup>3</sup>, Harkin, D. P.<sup>1, 2</sup>, McIntosh, S. A.<sup>1</sup>, Kennedy, R. D.<sup>1, 2</sup> and Savage, K. I.<sup>1</sup>.

1. Centre for Cancer Research and Cell Biology, Queen's University Belfast, United Kingdom, BT9 7AE.

2. Almac Diagnostic Services, Craigavon, Northern Ireland, United Kingdom, BT9 7AE.

3. Department of Cancer Biology, Basser Center for BRCA, Abramson Family Cancer Research Institute, Perelman School of Medicine, University of Pennsylvania, 421 Curie Boulevard, Philadelphia, Pennsylvania 19104, USA

## **Abstract (max 150)**

Tumours with genomic instability demonstrate enhanced immunogenicity and potential for response to immune checkpoint blockade (ICB). We previously demonstrated activation of the cGAS-STING pathway following loss of DNA repair, resulting in cytokine induction, lymphocytic infiltration and immune checkpoint activation. Here we explore the role of chemotherapies in inducing this innate immune response, identifying topoisomerase II (topo-II) inhibitors, particularly doxorubicin, as potent inducers of a cGAS-STING dependent interferon response. Mechanistically, topo-II inhibition resulted in significant induction of cytoplasmic DNA and subsequent micronuclei formation, a requirement for efficient cGAS-STING activation, and consequent cytokine and immune checkpoint gene induction. Importantly, increased cytokine and immune checkpoint gene expression, as well as increased immune cell infiltration, was also observed in patient derived breast tumour biopsies following topo-II inhibitor-based treatment. Taken together, this study indicates topo-II inhibitors such as doxorubicin, may be best placed to induce immunogenic inflammation, and thereby increase responses to ICB therapies.

## **Significance (max 50)**

This work demonstrates how topo-II inhibitors induce STING-pathway activation, cytokine induction and immune checkpoint protein upregulation in cancer cells and provides a rationale for combining topo-II inhibitors with ICB therapy in early breast cancer.

## **Introduction**

Defective BRCA/Fanconi anaemia DNA pathway repair machinery has been reported in an estimated 25% of breast cancers [1]. Furthermore, an estimated 60-69% of triple negative breast cancers (tumours lacking oestrogen receptor, progesterone receptor, and HER2 amplification) display a “BRCAness” genomic instability phenotype, with features that mimic BRCA1/2 mutated tumours [2]. Importantly, genomic instability correlates with benefit from ICB, with emerging predictive biomarkers, such as tumour mutational burden, demonstrating promise in the clinic [3].

Response to ICB in genomically unstable tumours has been attributed to accumulation of mutations resulting in neo-antigen production. ICB, such as targeting Programmed cell Death protein 1 (PD-1), then enables an immune response to these neo-antigens through reactivation of tumour-infiltrating lymphocytes. However, we recently reported an additional mechanism for immune activation in double strand break repair (DSBR)-deficient breast cancers, as a result of cytoplasmic DNA originating from defective DNA repair. Damaged cytoplasmic DNA triggers the cGAS-STING pathway, resulting in IRF3 activation and a resultant Type-I interferon response-like transcriptional cascade [4]. Additionally, we have generated a 44-gene expression based assay for identifying activation of this pathway in FFPE tumour samples termed the DNA Damage Immune Response (DDIR) assay [5, 6]

The majority of breast cancers do not respond to single agent ICB [7]. A potential method of improving response rates may be to enhance the immunogenicity of the tumour. STING agonists, cyclic dinucleotides administered by intra-tumoural injection, are now in clinical trials in combination with ICB. However, as radiotherapy and chemotherapy also result in STING pathway activation [4, 8, 9], the role of these as immune adjuvants is also of interest.

Although the exact mechanisms linking therapeutic DNA damage to cGAS-STING activation remain to be fully elucidated, studies of ionising radiation suggest the formation of micronuclei may be required. Damaged or lagging chromosome fragments are unable to be incorporated into the nucleus but instead are independently compartmentalised into cytoplasmic micronuclei [8, 9]. cGAS co-localises with damaged DNA within these micronuclei, which rupture during mitosis, resulting in cGAS-mediated 2'3' cGAMP production and subsequent STING activation, resulting in IRF3/TBK1 activation and downstream transcriptional induction of Type-I interferon stimulated genes [8, 9].

An extensive number of clinical trials are in progress using combinations of ICB with various chemotherapeutic agents in a number of solid tumours, resulting in mixed outcomes [10]. These studies, however, are largely empirical with the addition of immune checkpoint inhibiting drugs to conventional chemotherapeutic regimens. It is possible, however, that certain chemotherapy agents may be more effective than others in the activation of an immune response [11].

To identify chemotherapeutic agents that maximally activate the cGAS-STING pathway, we assessed induction of two key cGAS-STING activated cytokines CXCL10 and CCL5 following treatment with  $IC_{30}$  doses of various chemotherapies. Here we show that the topo-II inhibitors doxorubicin and epirubicin are potent activators of the cGAS-STING pathway, dependent on micronuclei formation following DNA damage.

## **Results**

### *Inhibition of topoisomerase I and II strongly induces CXCL10/CCL5 expression*

In order to identify drugs that could activate the cGAS-STING pathway, we selected a variety of compounds representative of classes of chemotherapy used in the clinic. These included the intrastrand/interstrand crosslinking agents cisplatin and mitomycin C, the anti-mitotic agents paclitaxel and vinorelbine, the topo-I inhibitor irinotecan, the topo-II inhibitors doxorubicin and etoposide and the anti-metabolite 5-fluorouracil. In order to allow the evaluation of immune activation at equivalent cytotoxic concentrations, 48 hour IC<sub>30</sub> values were identified in HeLa cells (**Table S1**). CXCL10 and CCL5 expression, two STING-dependent cytokines associated with lymphocyte recruitment to the tumour microenvironment, was then assessed by qRT-PCR. With the exception of the anti-mitotics, we observed a significant increase in CXCL10 and CCL5 expression with all compounds versus the vehicle treated control, with the greatest increases observed for irinotecan (11.6- and 32.8-fold), doxorubicin (74.2- and 52.2-fold) and etoposide (42.7- and 27.8-fold) (**Figure 1A**). Although all agents, excepting the anti-mitotic agents, induced DNA damage (**Figure S1A**), activation of CXCL10 and CCL5 did not appear to correlate with levels of DNA damage as assessed by H2AX phosphorylation ( $\gamma$ H2AX) (**Figure S1B**). cGAS is a cytoplasmic protein and is known to be activated by cytosolic double stranded DNA (dsDNA), after which it catalyses the production of 2,3-cGAMP, which in turn activates STING [12]. We therefore assessed cytosolic dsDNA following chemotherapy treatment using immunofluorescent staining with a dsDNA specific antibody. Treatment with cisplatin, mitomycin C, irinotecan, doxorubicin, etoposide and 5-FU, all resulted in cytosolic dsDNA (**Figure 1B**). Quantification using a previously described image compartmentalisation and quantification algorithm [13],

confirmed that cytosolic dsDNA significantly increased following treatment with cisplatin, mitomycin C, irinotecan, doxorubicin, etoposide and 5-FU, in comparison to vehicle treated control cells (**Figure 1C**).

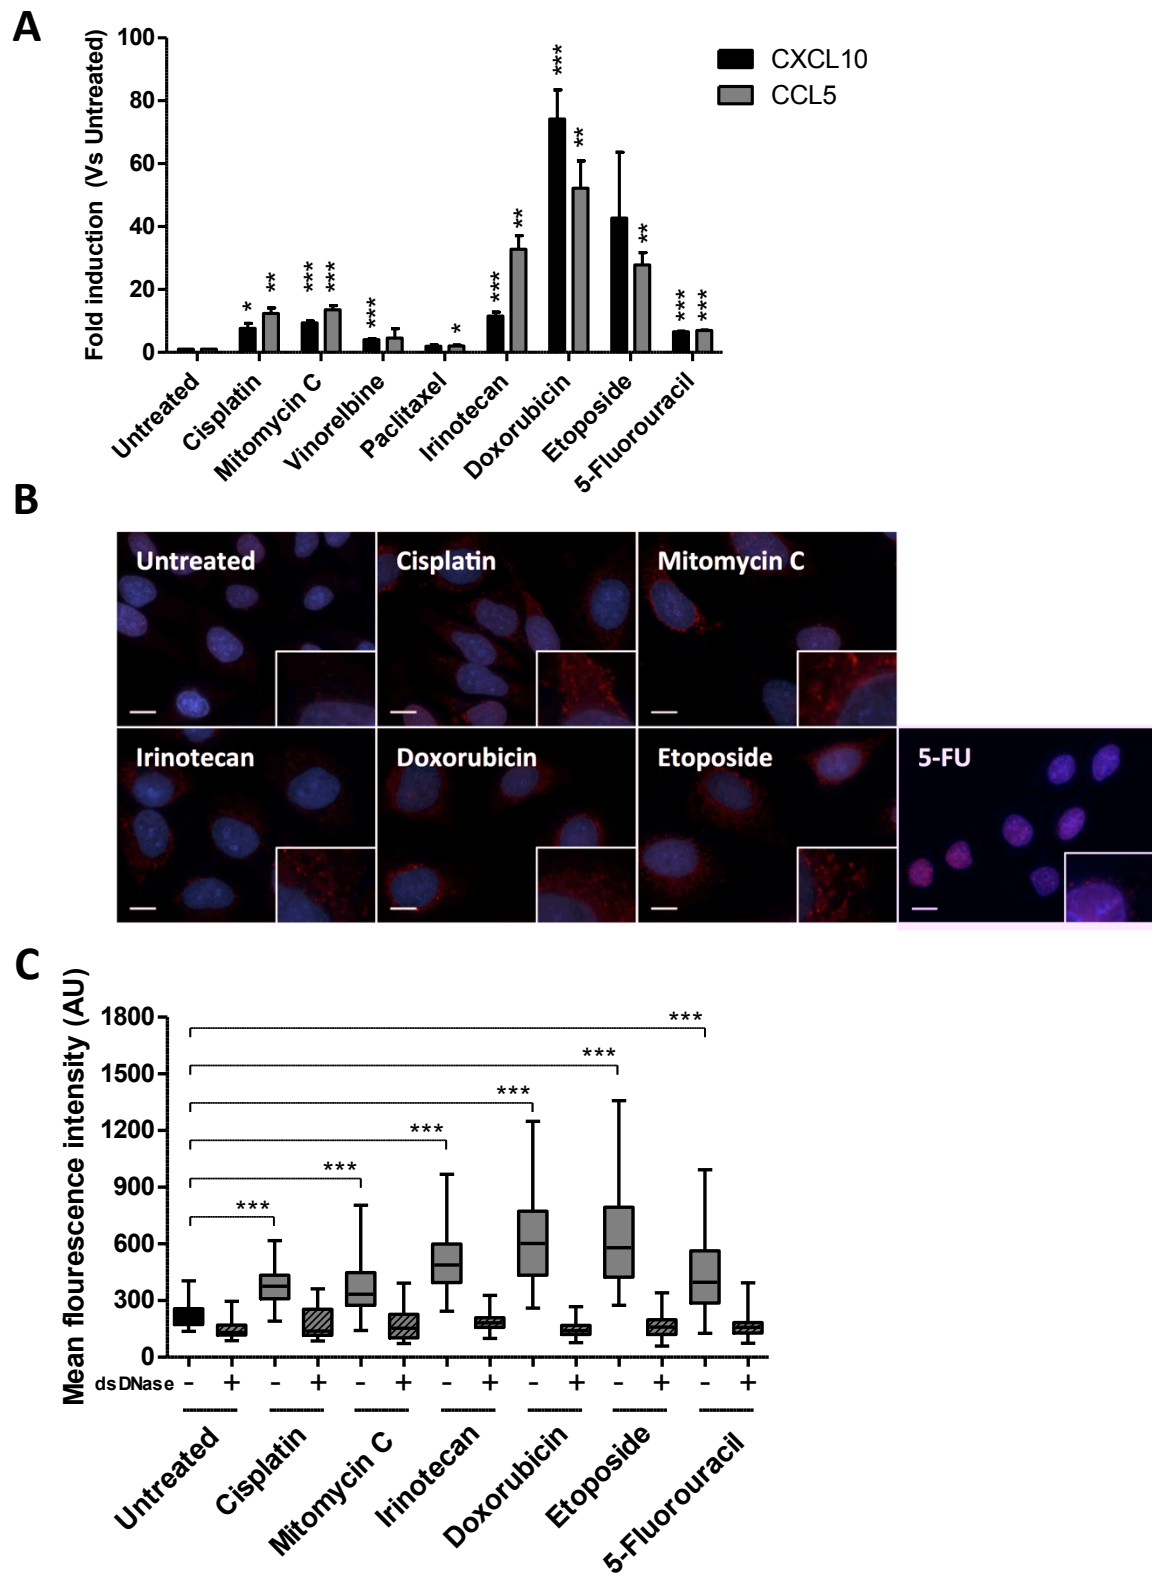

**Figure 1. Inhibition of topoisomerase I and II causes the greatest increase in CXCL10/CCL5 expression in HeLa cells.** A) Treatment with 48 hour  $IC_{30}$  values of chemotherapy significantly increased CXCL10 and CCL5 expression in HeLa cells. B) Treatment with 48 hour

IC<sub>30</sub> values of DNA damaging chemotherapeutics causes an increased translocation of dsDNA into the cytosol in HeLa cells. C) Quantification of cytosolic dsDNA shown in B. dsDNAse treatment was used as a control to confirm quantified fluorescence signal was dsDNA (\*\*\*=p≤0.001).

#### *Topoisomerase mediated cytokine induction is cGAS-STING-dependent*

We next assessed the dependency of CXCL10 and CCL5 expression on the cGAS-STING pathway. Depletion of either cGAS or STING (using 2 independent siRNAs) 48-hours prior to treatment with cisplatin, mitomycin C, irinotecan, doxorubicin or etoposide led to a significant attenuation in CXCL10 and CCL5 induction (**Figure 2A-B & S2A-B**). As doxorubicin treatment consistently resulted in the greatest increase in CXCL10 and CCL5 expression, we focused our subsequent analysis on this compound. Similarly, doxorubicin treatment of isogenic CRISPR knockout MCF10A cells (normal-like breast cells) harbouring loss of cGAS (crCgAS) or STING (crSTING) resulted in a 12.5- and 10.5-fold increase in CXCL10 and CCL5 expression in control cells, with significant attenuation of CXCL10 and CCL5 induction in cGAS and STING null cells (**Figure 2C & S2C-D**). Importantly, induction of cytosolic dsDNA was independent of cGAS and STING (**Figure S2E**). Together these data indicate that the cytosolic DNA, as a result of DNA damage, is upstream of cGAS-STING and that cytokine expression is dependent on cGAS and STING.



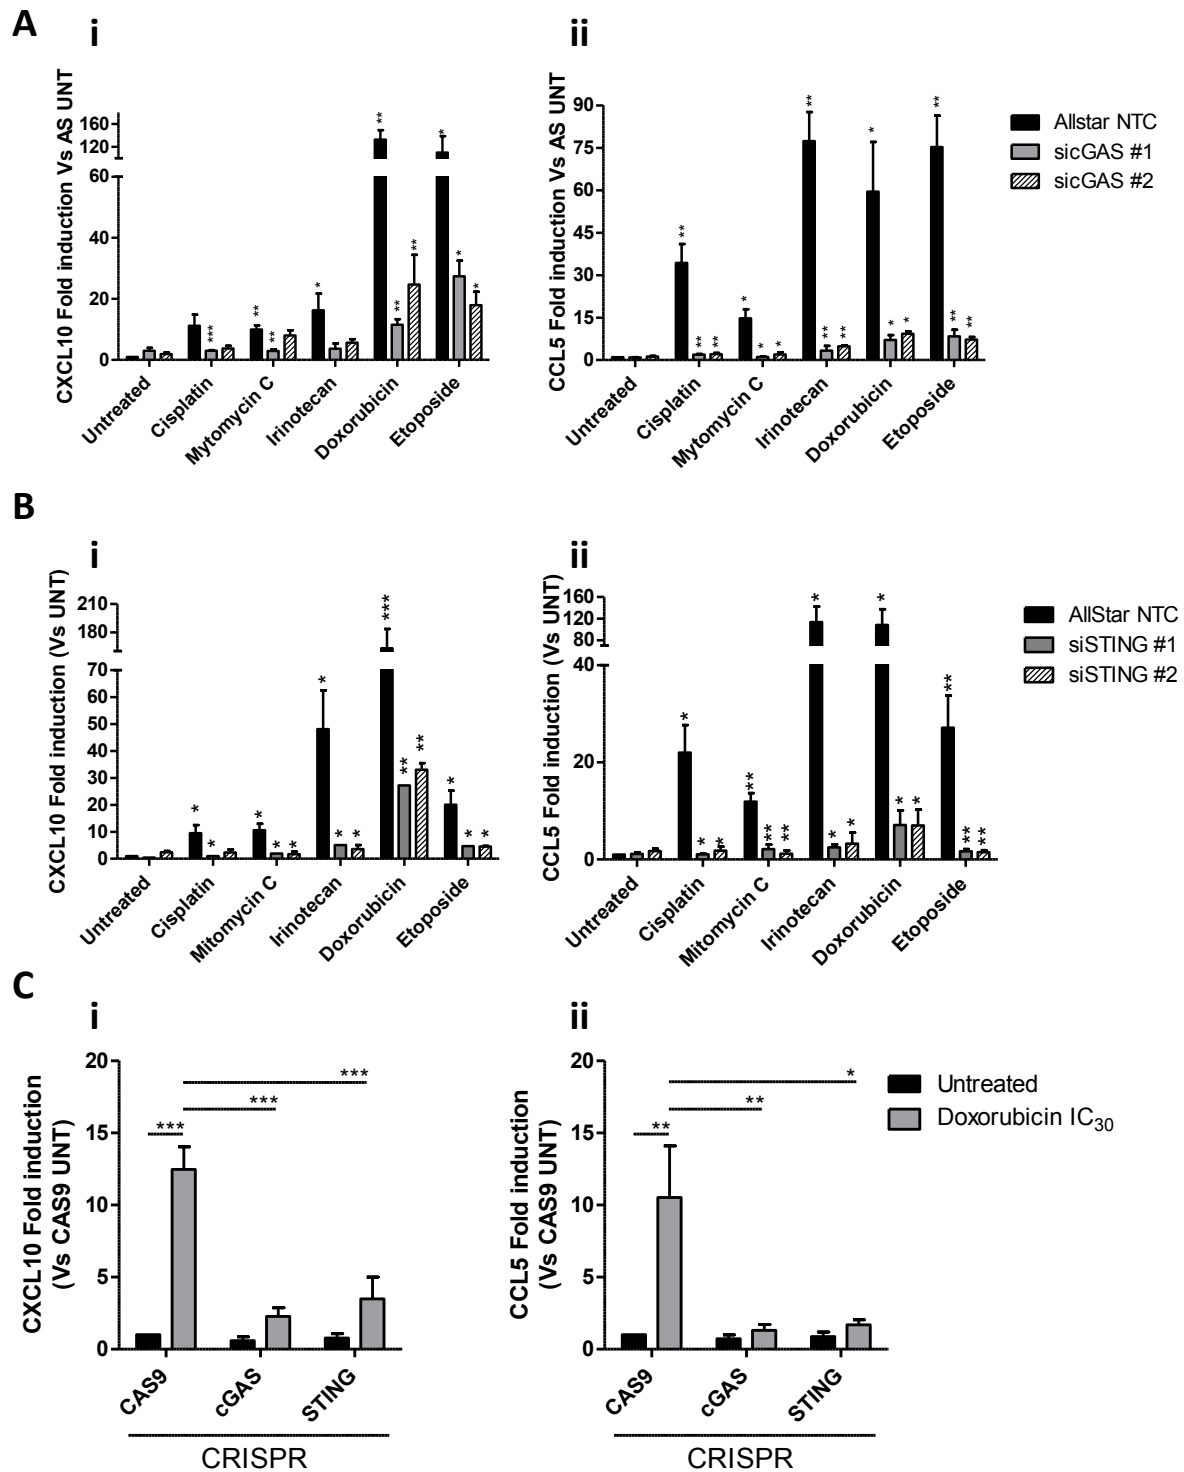

**Figure 2. Chemotherapeutic treatment stimulates CXCL10 and CCL5 in a cGAS and STING dependent manner.** qRT-PCR analysis of CXCL10 and CCL5 in control and (A) cGAS and (B) STING depleted HeLA cells, following 48-hour treatment with indicated drugs C) qRT-PCR analysis of CXCL10 and CCL5 expression in MCF10A cells with CRISPR knock out of cGAS or

STING (control cells express Cas9 only, with no gene targeting guide RNA), following 48-hour treatment with IC<sub>30</sub> doxorubicin. All data represents mean of 3 independent experiments +/- SEM (\*=p≤0.05, \*\*=p≤0.01, \*\*\*=p≤0.001).

*Treatment with doxorubicin activates CXCL10/CCL5 expression in a micronuclei dependent manner*

Previous reports have indicated that cGAS concentrates within radiation-induced micronuclei, which contain broken DNA fragments formed due to unrepaired DSBs that persist through mitosis. These structures are enveloped by a micronuclear membrane, which ruptures during mitotic progression releasing DNA and activated cGAS into the cytoplasm, resulting in potent STING activation and a subsequent Type I interferon response [8, 9]. We therefore asked if this mechanism also underpinned the activation of cGAS-STING observed in response to doxorubicin. First we evaluated the expression of CXCL10 and CCL5 over a 48-hour time-course in HeLa cells treated with an IC<sub>30</sub> dose of doxorubicin. We observed small increases in CXCL10 and CCL5 expression at early time points following doxorubicin treatment (5-12 fold) up to 24 hours post-treatment, with marked increase in CXCL10 (50.1-fold increase) and CCL5 (53.3-fold increase) expression 48-hours post-treatment (**Figure 3A**). Using immunofluorescent imaging we also assessed DNA damage and micronuclei formation using antibodies targeting γH2AX and Lamin B1 (**Figure 3B**). We observed a peak in DNA damage and micronuclei positive cells 24-hours after doxorubicin treatment (**Figure 3C-D**). Together, these data indicate that doxorubicin induces micronuclei that are temporally associated with cytokine induction. To further explore this, we blocked micronuclei formation in doxorubicin treated cells by co-treating with Nocodazole, a

microtubule depolymerising agent that results in early mitotic arrest, and assessed CXCL10 and CCL5 induction (**Figure S3A-B**). This resulted in complete abrogation of doxorubicin induced CXCL10 and CCL5 induction (**Figure 3E & S3C**). Importantly, doxorubicin induced DNA damage was unaffected by nocodazole treatment, despite a complete loss of micronuclei induction in these cells (**Figure 3F-G**). Taken together these data suggest that S-phase DNA damage results in micronuclei formation during mitosis that release cytosolic DNA and induce cGAS-STING dependent cytokine expression.

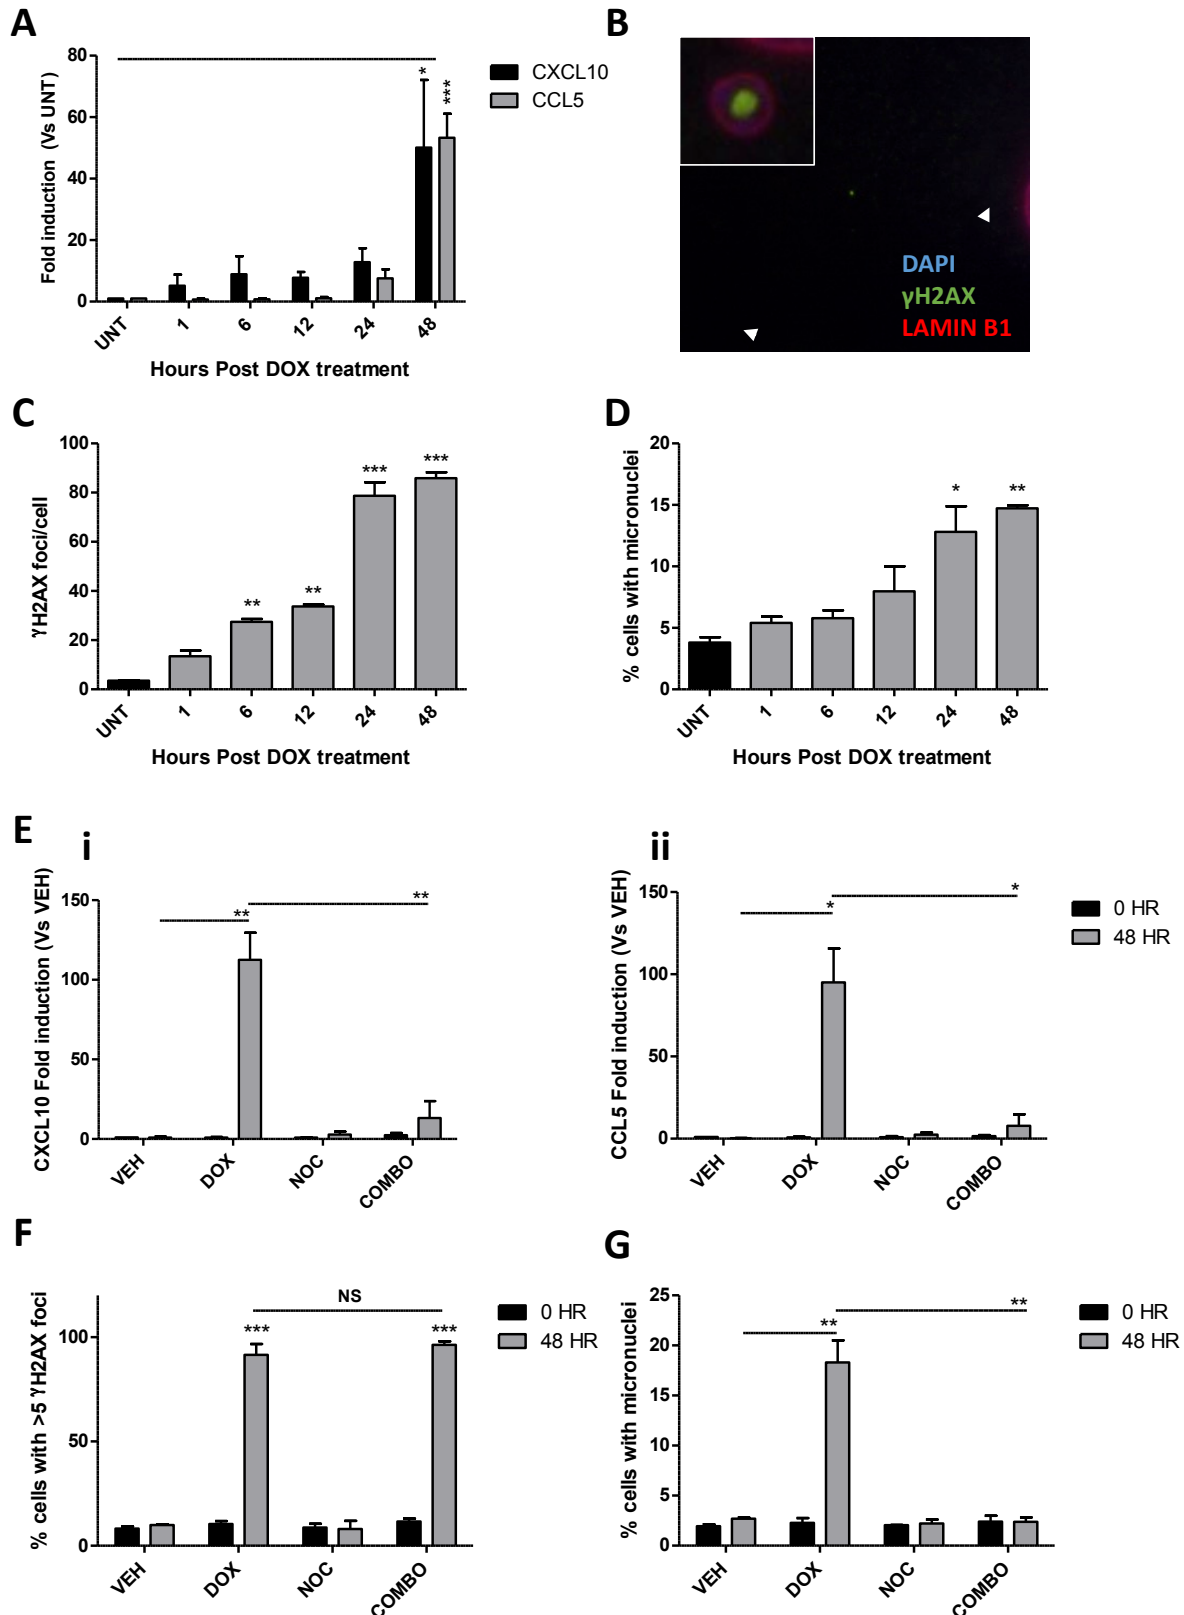

**Figure 3. Doxorubicin induced CXCL10/CCL5 expression is micronuclei dependent.** A) Time course of CXCL10/CCL5 expression in HeLa cells following treatment with IC<sub>30</sub> doxorubicin.

B) Representative image of immunofluorescent staining of  $\gamma$ H2AX and LAMINB1 following 48 hours doxorubicin treatment. C) Quantification of  $\gamma$ H2AX foci in HeLa cells over a 48 hour time course treatment as shown in B. D) Percentage of cells with micronuclei evaluated at the indicated time points following treatment. E) qRT-PCR mediated quantification of CXCL10 (i) and CCL5 (ii) in HeLa cells treated with vehicle, doxorubicin (Dox), Nocodazole (Noc), or combined Dox and Noc (Combo) for the indicated timepoints. F) Confirmation of doxorubicin induced DNA damage in HeLa cells treated as in E. G) Percentage of cells shown in E with micronuclei evaluated at the indicated timepoints. All quantitative data represents mean of 3 independent experiments +/- SEM (\*= $p \leq 0.05$ , \*\*= $p \leq 0.01$ , \*\*\*= $p \leq 0.001$ ).

*Topo-II inhibition induces cytokine and immune checkpoint expression in cell line models and breast tumours.*

Both doxorubicin and epirubicin are used in the neoadjuvant and adjuvant treatment of early breast cancer. Therefore, we confirmed if epirubicin had a similar effect to doxorubicin *in vitro* in terms of induction of cytokine expression. CXCL10 was induced between 120- and 88-fold and CCL5 induced between 118- and 110-fold following chemotherapy (**Figure 4A**). Epirubicin also induced similar levels of DNA damage, cytosolic DNA and micronucleated cells (**Figure S4A-C**). We and others have previously reported that activation of the cGAS-STING pathway not only drives cytokine induction and tumour lymphocytic infiltration, but also leads to transcriptional upregulation of immune checkpoint genes including PD-L1, PD-L2, GAL9 and HVEM [4]. Therefore, we investigated the effect of doxorubicin and epirubicin treatment on the expression of these well established immune checkpoint genes. Indeed, expression of all of these genes was significantly upregulated following treatment with

either doxorubicin or epirubicin (**Figure 4B & S4D**). We also carried out RNA-Seq analysis and examined DDIR signature scores in HeLa cells following treatment with doxorubicin or epirubicin. This showed a significant increase in DDIR scores, as well as induction of CXCL10 and CCL5, following both doxorubicin and epirubicin treatment (**Figure 4C**). Examining this data further revealed induction of a panel of classical Type I interferon response genes, as well as immune checkpoint genes, following treatment with either doxorubicin or epirubicin (**Figure 4C**). This suggests that topo-II inhibition leads to activation of the cGAS-STING pathway resulting in increased immune checkpoint gene expression in addition to cytokine expression.

We hypothesised that *in vivo*, this would lead to tumour lymphocytic infiltration, but limited immune mediated tumour killing. To test this, we performed RNA-seq analysis of breast tumour core biopsies from 4 early breast cancer patients at diagnosis and after 3-cycles of neoadjuvant FEC (5-fluorouracil, epirubicin, cyclophosphamide) chemotherapy. These patients were chosen as they did not respond to neoadjuvant therapy (assessed via Residual Cancer Burden scoring following tumour resection), suggesting that none of these tumours had an intrinsic DNA repair defect and were immunogenically “cold” at diagnosis [14]. Consistent with this, all four patients were DDIR negative at diagnosis (**Figure 4D**). In keeping with our pre-clinical data, we observed an increase in expression in CXCL10 and CCL5 following 3-cycles of FEC chemotherapy (**Figure 4D**). Additionally, all 4 tumours converted from DDIR negative at diagnosis, to DDIR positive following treatment (**Figure 4D**). Moreover, expression of many well characterised immune checkpoint genes, including the clinically targeted PD-L1 and CTLA4 genes, increased in all patients’ tumours following FEC therapy (**Figure 4D**). We next studied the presence of tumour infiltrating lymphocytes (TILs) following doxorubicin treatment using H+E staining of tumour sections. As expected,

all four demonstrated increased TILs post-chemotherapy (**Figure 4E**). Well established gene expression signatures were used to characterise the TILs further [15]. Consistent with the histology, signature scores for the majority of immune cells, particularly T-cells and cytotoxic T-cells, increased in these tumours following FEC treatment (**Figure 4D**). Importantly, we observed increased signature scores for exhausted T-cells following chemotherapy treatment, in keeping with the expression of immune checkpoint genes in these tumours (**Figure 4D**).

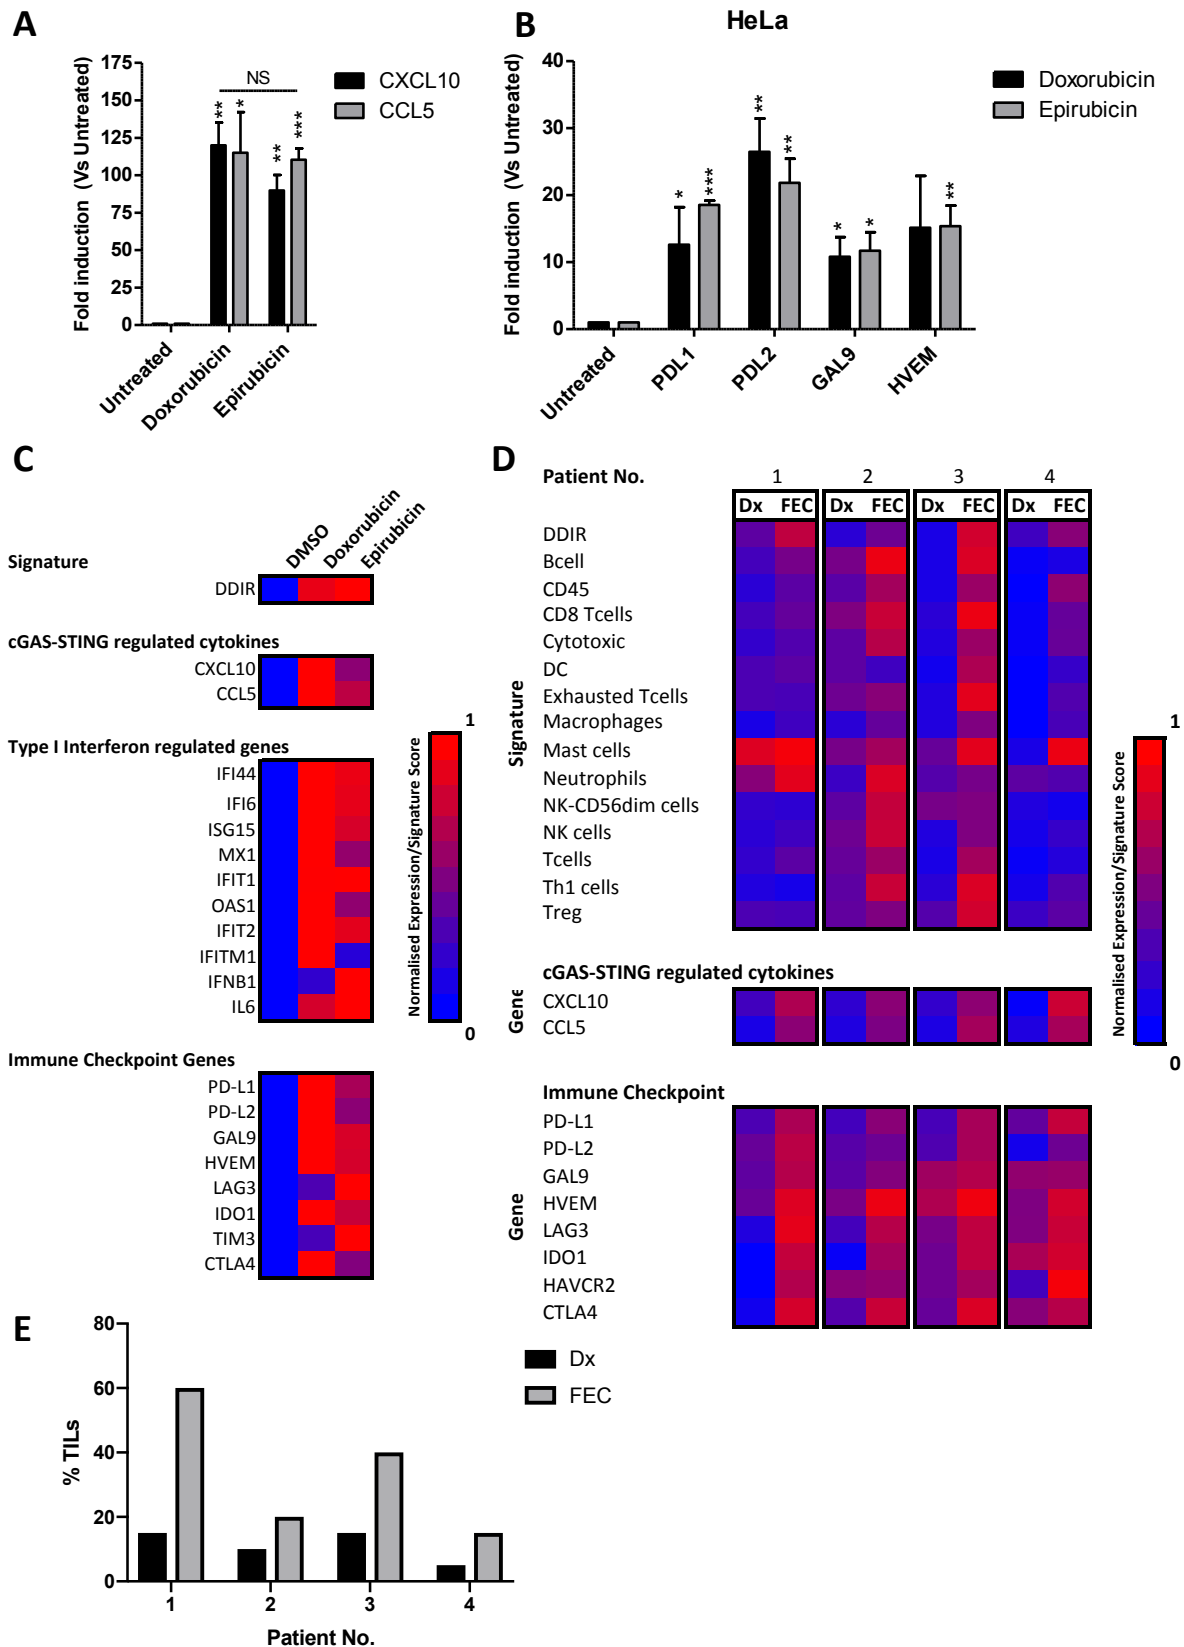

**Figure 4. Anthracycline treatment increases CXCL10 and CCL5 expression using patient samples.** qRT-PCR analysis of A) CXCL10 and CCL5 and B) Immune checkpoint gene



expression following 48 hours treatment with  $IC_{30}$  doxorubicin or epirubicin in HeLa cells. All data represents mean of 3 independent experiments +/- SEM (\*= $p \leq 0.05$ , \*\*= $p \leq 0.01$ , \*\*\*= $p \leq 0.001$ ). C) RNA-Seq generated DDIR signature and individual gene expression values from vehicle treated (DMSO) HeLa cells and following treatment  $IC_{30}$  doses of doxorubicin or epirubicin for 48hrs. D) RNA-Seq generated gene signature scores (top Panel) and individual gene expression values from pre-treatment diagnostic (Dx) and post 3-cycles of FEC treatment (FEC) breast tumour core biopsies from 4 individual patients (labelled 1-4). E) % TILs quantified H+E stained sections from the same core biopsies utilised for RNA-Seq analysis shown in C.

## **Discussion**

Emerging evidence suggests that defects within the DNA damage response pathway, in particular defective DNA repair, stimulate inflammation. Examples of this include loss of NSB1, CHK2, [16] BRCA1, FANCD2 [4], ATM [16, 17], DNASE2 [18], MRE11 [19]. Additionally, activation of immune genes has been linked with inhibition of specific DNA repair proteins such as PARP1, inhibitors of which have recently shown efficacy in combination with ICB agents in breast cancer [20]. Furthermore, a number of groups have demonstrated stimulation of type 1 interferons and cytokines following treatment with DNA damaging agents or ionizing radiation in both *in vitro* and *in vivo* settings. Nonetheless, to the best of our knowledge, this is the first time several chemotherapeutic classes have been compared, in terms of cGAS-STING activation, and a mechanism of action identified.

In this study we identified topo-II inhibitors as potent activators of a cGAS-STING-dependent cytokine response. We found that the topo-II inhibitors damage DNA, form micronuclei and release dsDNA into the cytosol. This drives expression of inflammatory cytokines CXCL10 and CCL5 in a cGAS and STING dependent manner.

Assessing activation of these cytokines over time revealed a modest induction of both CXCL10 and CCL5 at early time points following doxorubicin treatment. However, we observed a dramatic increase in their induction 48 hours following treatment, which was abrogated by inhibition of mitosis using Nocodazole. Micronuclei are formed during mitosis, when lagging dsDNA fragments, produced by DNA damage and/or inefficient repair, are packaged within a distinct nuclear membrane. Previous studies have demonstrated micronuclear rupture leads to cytoplasmic dsDNA release and potent activation of STING,

with a downstream type I interferon response [8, 9]. Our data suggest the same mechanism for cGAS-STING activation following topo-II inhibition.

Historically the anthracyclines doxorubicin and epirubicin have been known to be associated with inflammation. Both drugs promote immune cell recruitment to the tumour site via pro-inflammatory signals, causing immunogenic cell death [21]. Doxorubicin has also been shown to decrease the number of MDSCs *in vivo*, leading to enhanced numbers of CD4+ and CD8+ cells in addition to increased IFN- $\gamma$ , granzyme B and perforin expression [22]. Furthermore, blockade of Treg-mediated dampening of CD8+ cells has been shown to be impaired following epirubicin treatment, as a result of blocking the interaction between FoxP3 and NF- $\kappa$ B subunit p65 *in vitro* [23]. Previous reports have shown patients receiving doxorubicin treatment demonstrate elevated levels of pro-inflammatory markers, such as ICAM1 [24], IL-6 and sIL-6R [25, 26]. Interestingly, follow up months after treatment reveals a dramatic fall in IL6 and sIL-6R levels, suggesting this sharp transient increase is a consequence of treatment [26].

We hypothesised that in patients, treatment with topo-II inhibitors, such as doxorubicin and epirubicin, would lead to cGAS-STING dependent transcriptional activation of cytokines and immune checkpoint genes, thereby promoting immune cell recruitment and tumour infiltration, but preventing immune mediated tumour cell killing via immune checkpoint activation. Indeed, analysis of breast tumour core biopsy samples collected from patients pre- and post- FEC treatment confirmed these *in vitro* findings, demonstrating increased expression of these key cGAS-STING driven cytokines, and immune checkpoint genes. Additionally, FEC treatment led to increased TILs within all biopsy samples and, using well validated signatures of different immune cell subtypes, we found that FEC treatment lead to

increased scores for many immune cell types, particularly CD8-positive/cytotoxic T-cells. In keeping with our preclinical data, we also observed upregulation of key immune checkpoint genes, including PD-L1, in all breast tumours following FEC treatment.

In recent years, following the use of single agent immune checkpoint inhibitors in clinical trials, efforts have been made to identify combination therapies, which provide maximal benefit to patients. This has focused on combining well-characterised and commonly used chemotherapeutic classes (such as anti-metabolites, anti-microtubule, and crosslinking agents) with novel ICB treatments to improve outcome [10]. However, the majority of these combinations are empirically based on currently used regimens. Our data suggest the rational combination of topo-II inhibitors with ICB agents, particularly those targeting the PD1/PD-L1 interaction. Interestingly, the recently reported TONIC trial, which aimed to utilise different modes of DNA damage to enhance immune responses to the anti-PD1 agent nivolumab in metastatic TNBC, reported that the most promising combination, in terms of enhanced objective relative response (ORR), was doxorubicin. In this study, patients were given no induction therapy or induction therapy with hypofractionated radiotherapy, cyclophosphamide, cisplatin or doxorubicin followed by 3-cycles of nivolumab. The highest response rate (35%) was seen in patients receiving induction doses of doxorubicin [27]. Furthermore, pre-treatment of these patients with doxorubicin also increased expression of the immune checkpoint genes PD1 and PDL1 [27]. Crucially, scheduling of these treatment regimens is of paramount importance. Patients in the TONIC trial were given two low dose (15mg) treatments of doxorubicin, followed by nivolumab treatment. Nonetheless, it is not clear whether this dose was optimal for immune priming and/or whether maintenance of

doxorubicin during nivolumab therapy is needed in order to maintain immune activation and thereby enhance response to ICB therapy. Another recent clinical trial has investigated the potential of an immunotherapy induction phase. This work demonstrated a higher complete pathological response rate in TNBC patients versus the chemotherapy alone (53.4% versus 44.2%) in patients treated with durvalumab, followed by combination treatment of weekly Nab-paclitaxel for 12 weeks, followed by 4 cycles of combination therapy with epirubicin and cyclophosphamide [28]. Despite this trial not having a pre-chemotherapy induction arm, it raises the question whether induction with anthracycline chemotherapy before subsequent combination and/or maintenance during treatment will be the most effective in the clinic.

Taken together our data suggest that topo-II inhibitors activate the cGAS-STING innate immune pathway, through the induction of cytoplasmic dsDNA, and may have a clinical role in increasing the immunogenicity of tumours in combination with immune checkpoint based therapies. Recent clinical investigations have confirmed this association, nevertheless, further clinical studies to investigate dose and scheduling of combination therapies are required to optimise these combinations. Additionally, the use of biomarkers, such as DDIR, to identify immunogenically cold tumours need to be clinically validated and utilised to identify patients whom will benefit from these combinations. Additionally, studies utilising these combinations outside of breast cancer may also prove effective, particularly in tumour types that exhibit low rates of DNA repair deficiency.

## **Materials and Methods**

### *Cell lines, Nocodazole block and generation of chemotherapeutic IC<sub>30</sub> values*

HeLa cells (human cervix adenocarcinoma) (ATCC) were cultured in Dulbecco Modified Eagle Medium containing 10% FCS. MCF10A (non-tumour breast epithelial) were cultured in DMEM/F12 media supplemented with 5% Horse serum, 100 ng/mL Cholera toxin, 10 ng/mL insulin, 20 ng/mL EGF and 0.5 µg/mL hydrocortisone. Cells were maintained in 5 % CO<sub>2</sub> at 37 °C. All subsequent cells have been derived from original ATCC validated stocks. For G2/M arrest using Nocodazole, cells were incubated in media containing 100 ng/mL Nocodazole (ab120630, Abcam UK) for 24 hours to induce G2/M checkpoint arrest. Following incubation, cells were washed with PBS and fresh media added.

For generation of IC<sub>30</sub> values, cells were treated with chemotherapeutics for 48 hours before assessing viability using Cell Titre Glo reagent (Promega, UK), as per manufacturer's instructions. Luminescence was read using a Biosciences BioTek plate reader. Values were analysed using GraphPad Prism (V5.03) and IC<sub>30</sub> values generated.

### *qRT-PCR*

RNA was isolated from samples using RiboZol (VWR, USA) according to manufacturer's instructions. Complementary DNA was generated using First Strand cDNA synthesis kit (Roche, Basel, Switzerland). qRT-PCR evaluation was completed using the following primer sets: CXCL10 forward 5' GGC CAT CAA GAA TTT ACT GAA AGC A 3' and reverse 5' TCT GTG TGG TCC ATC CTT GGA A 3', CCL5 forward 5' TGC CCA CAT CAA GGA GTA TTT 3' and reverse 5' CTT TCG GGT GAC AAA GAC G 3' and PUM1 forward 5' CCA GAA AGC TCT TGA GTT TAT

TCC 3' and reverse 5' CAT CTA GTT CCC GAA CCA TCT C 3'. Differences in expression were detected using a Roche LightCycler®480.

### *Western blotting*

Western blotting was carried out as previously described [4] using the following antibodies/dilutions; anti- $\gamma$ H2AX (1/2000; JBW301-MerckMillipore), anti- $\beta$ -actin (1/10000; A2228-Sigma), anti-STING (1/1000, 13647-Cell Signalling), anti-cGAS (1/1000; 15102-Cell Signalling), anti-vinculin (1/1000; 14-9777-82-Thermo), anti-mouse-HRP (1/10000; 7076-Cell signalling), anti-rabbit-HRP (1/10000; 7074-Cell Signalling).

### *Immunofluorescence*

Immunofluorescent staining was carried out as previously described [4] using the following antibodies/dilutions; anti-dsDNA (1/50; Santa Cruz Biotechnology), anti- $\gamma$ H2AX (1/2000; JBW301-MerckMillipore), anti-Lamin B1 (1/1000; ab16048-Abcam), anti-mouse-IgG AlexaFlour-488 (1/1000; ab150113-Abcam), anti-rabbit-IgG AlexaFlour-594 (1/1000; A-11072-ThermoFischer), anti-mouse-IgG AlexaFlour-594 (1:1000; ReadyProbes). Nuclear DNA was stained using Hoechst-33342 (5  $\mu$ g/mL-SIGMA).

### *siRNA reverse transfection*

Cells were reverse transfected with siRNA (10 nM) using Lipofectamine RNAiMAX (Life Technologies, UK) using the following siRNAs; siSTING\_#1: 5'-CAGCGGCUGUAUUAUUCUCCUCCC-3', siSTING\_#2: 5'-GGUCAUAUUACAUCGGAUAAU-3', sicGAS\_#1: 5'-AGAGAAAUGUUGCAGGAAAUU-3', sicGAS\_#2: 5'-CAGCUUCUAAGAUGCUGUCAAG-3'. Cells were collected for analysis 72-hours post-transfection.

### *Patient samples*

Pre-and on-treatment neoadjuvant chemotherapy breast tumour samples were collected by 14G ultrasound guided needle core biopsy (Ethical approval obtained from the Office of the Research Ethics Committee Northern Ireland, reference 13/NI/0107).



## References

1. Turner, N., A. Tutt, and A. Ashworth, *Hallmarks of 'BRCAness' in sporadic cancers*. *Nat Rev Cancer*, 2004. **4**(10): p. 814-9.
2. Lips, E.H., et al., *Indicators of homologous recombination deficiency in breast cancer and association with response to neoadjuvant chemotherapy*. *Ann Oncol*, 2011. **22**(4): p. 870-6.
3. Cesano, A. and S. Warren, *Bringing the next Generation of Immuno-Oncology Biomarkers to the Clinic*. *Biomedicines*, 2018. **6**(1).
4. Parkes, E.E., et al., *Activation of STING-Dependent Innate Immune Signaling By S-Phase-Specific DNA Damage in Breast Cancer*. *J Natl Cancer Inst*, 2017. **109**(1).
5. Mulligan, J.M., et al., *Identification and validation of an anthracycline/cyclophosphamide-based chemotherapy response assay in breast cancer*. *J Natl Cancer Inst*, 2014. **106**(1): p. djt335.
6. Turkington, R.C., et al., *Immune activation by DNA damage predicts response to chemotherapy and survival in oesophageal adenocarcinoma*. *Gut*, 2019.
7. Swoboda, A. and R. Nanda, *Immune Checkpoint Blockade for Breast Cancer*. *Cancer Treat Res*, 2018. **173**: p. 155-165.
8. Harding, S.M., et al., *Mitotic progression following DNA damage enables pattern recognition within micronuclei*. *Nature*, 2017. **548**(7668): p. 466-470.
9. Mackenzie, K.J., et al., *cGAS surveillance of micronuclei links genome instability to innate immunity*. *Nature*, 2017. **548**(7668): p. 461-465.
10. Heinhuis, K.M., et al., *Enhancing antitumor response by combining immune checkpoint inhibitors with chemotherapy in solid tumors*. *Ann Oncol*, 2019. **30**(2): p. 219-235.
11. Zitvogel, L., et al., *Immunological aspects of cancer chemotherapy*. *Nat Rev Immunol*, 2008. **8**(1): p. 59-73.
12. Li, T. and Z.J. Chen, *The cGAS-cGAMP-STING pathway connects DNA damage to inflammation, senescence, and cancer*. *J Exp Med*, 2018. **215**(5): p. 1287-1299.
13. Vohhodina, J., et al., *The RNA processing factors THRAP3 and BCLAF1 promote the DNA damage response through selective mRNA splicing and nuclear export*. *Nucleic Acids Res*, 2017. **45**(22): p. 12816-12833.
14. Symmans, W.F., et al., *Long-Term Prognostic Risk After Neoadjuvant Chemotherapy Associated With Residual Cancer Burden and Breast Cancer Subtype*. *J Clin Oncol*, 2017. **35**(10): p. 1049-1060.
15. Danaher, P., et al., *Gene expression markers of Tumor Infiltrating Leukocytes*. *J Immunother Cancer*, 2017. **5**: p. 18.
16. Rodier, F., et al., *Persistent DNA damage signalling triggers senescence-associated inflammatory cytokine secretion*. *Nat Cell Biol*, 2009. **11**(8): p. 973-9.
17. Guo, M., et al., *High-resolution quantitative proteome analysis reveals substantial differences between phagosomes of RAW 264.7 and bone marrow derived macrophages*. *Proteomics*, 2015. **15**(18): p. 3169-74.
18. Gravina, G.L., et al., *XPO1/CRM1-selective inhibitors of nuclear export (SINE) reduce tumor spreading and improve overall survival in preclinical models of prostate cancer (PCa)*. *J Hematol Oncol*, 2014. **7**: p. 46.
19. Morita, R., et al., *DNA methyltransferase 1 is essential for initiation of the colon cancers*. *Exp Mol Pathol*, 2013. **94**(2): p. 322-9.
20. Pantelidou, C., et al., *PARP Inhibitor Efficacy Depends on CD8(+) T-cell Recruitment via Intratumoral STING Pathway Activation in BRCA-Deficient Models of Triple-Negative Breast Cancer*. *Cancer Discov*, 2019. **9**(6): p. 722-737.
21. Fucikova, J., et al., *Human tumor cells killed by anthracyclines induce a tumor-specific immune response*. *Cancer Res*, 2011. **71**(14): p. 4821-33.
22. Alizadeh, D., et al., *Doxorubicin eliminates myeloid-derived suppressor cells and enhances the efficacy of adoptive T-cell transfer in breast cancer*. *Cancer Res*, 2014. **74**(1): p. 104-18.

23. Kashima, H., et al., *Epirubicin, Identified Using a Novel Luciferase Reporter Assay for Foxp3 Inhibitors, Inhibits Regulatory T Cell Activity*. PLoS One, 2016. **11**(6): p. e0156643.
24. Mills, P.J., et al., *The relationship between fatigue and quality of life and inflammation during anthracycline-based chemotherapy in breast cancer*. Biol Psychol, 2005. **69**(1): p. 85-96.
25. Mercurio, G., et al., *Early epirubicin-induced myocardial dysfunction revealed by serial tissue Doppler echocardiography: correlation with inflammatory and oxidative stress markers*. Oncologist, 2007. **12**(9): p. 1124-33.
26. Mantovani, G., et al., *Persistence, up to 18 months of follow-up, of epirubicin-induced myocardial dysfunction detected early by serial tissue Doppler echocardiography: correlation with inflammatory and oxidative stress markers*. Oncologist, 2008. **13**(12): p. 1296-305.
27. Voorwerk, L., et al., *Immune induction strategies in metastatic triple-negative breast cancer to enhance the sensitivity to PD-1 blockade: the TONIC trial*. Nat Med, 2019.
28. Vida, A.R., et al., *Phase II randomized study of first line avelumab with carboplatin-gemcitabine versus carboplatin-gemcitabine alone in patients with metastatic urothelial carcinoma ineligible for cisplatin-based therapy*. Journal of Clinical Oncology, 2018. **36**(15\_suppl): p. TPS4591-TPS4591.
