# Supplementary material for: Topoisomerase II inhibitors induce cGAS-STING dependent inflammation resulting in cytokine induction and immune checkpoint activation
Source: bioRxiv or medRxiv preprint supplement (doi:10.1101/764662), 2019-10-24
Supplement: Supplementary file [file media-1.pdf]

| Units in $\mu\text{M}$ | HeLa             |                  | Mechanism of action                                                                         |
|------------------------|------------------|------------------|---------------------------------------------------------------------------------------------|
|                        | $\text{IC}_{50}$ | $\text{IC}_{30}$ |                                                                                             |
| Cisplatin              | 12.75            | 15.79            | Crosslinking agent                                                                          |
| Mitomycin C            | 3.89             | 5.55             | Interstrand crosslinking agent                                                              |
| Paclitaxel             | 0.0029           | 0.004            | Targets mitotic spindle assembly, blocking mitosis, activating cell checkpoint signalling   |
| Vinorelbine            | 0.0104           | 0.0137           | Targets mitotic spindle assembly, blocking mitosis, activating cell checkpoint signalling   |
| Irinotecan             | 45.28            | 97.29            | Metabolised into SN-38, an inhibitor of topoisomerase I                                     |
| Doxorubicin            | 0.3              | 0.8757           | Doxorubicin interacts with DNA by intercalation, disrupting topoisomerase II activity       |
| Etoposide              | 10.58            | 19.82            | Forms complex between DNA and Topoisomerase II enzyme, and prevents ligation of DNA strands |
| 5-Fluorouracil         | 1.11             | 1.98             | Antimetabolite, disrupts action of thymidylate synthase stopping production of new DNA      |

**Supplementary Table 1: Mechanism of action and  $\text{IC}_{30}$  and  $\text{IC}_{50}$  values of the indicated**

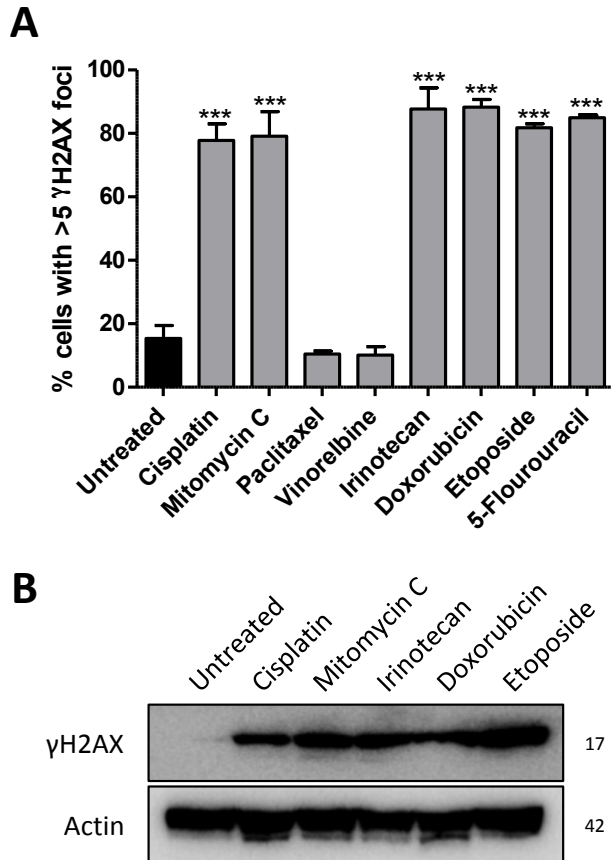

**Supplementary Figure 1.** A) Quantification of  $\gamma$ H2AX foci positive (>5 foci) cells following treatment of HeLa cells with 48-Hour IC30 values of the indicated chemotherapeutics B) Representative Western blot analysis of  $\gamma$ H2AX levels in HeLa cells with 48-Hour IC30 values of the indicated chemotherapeutics.

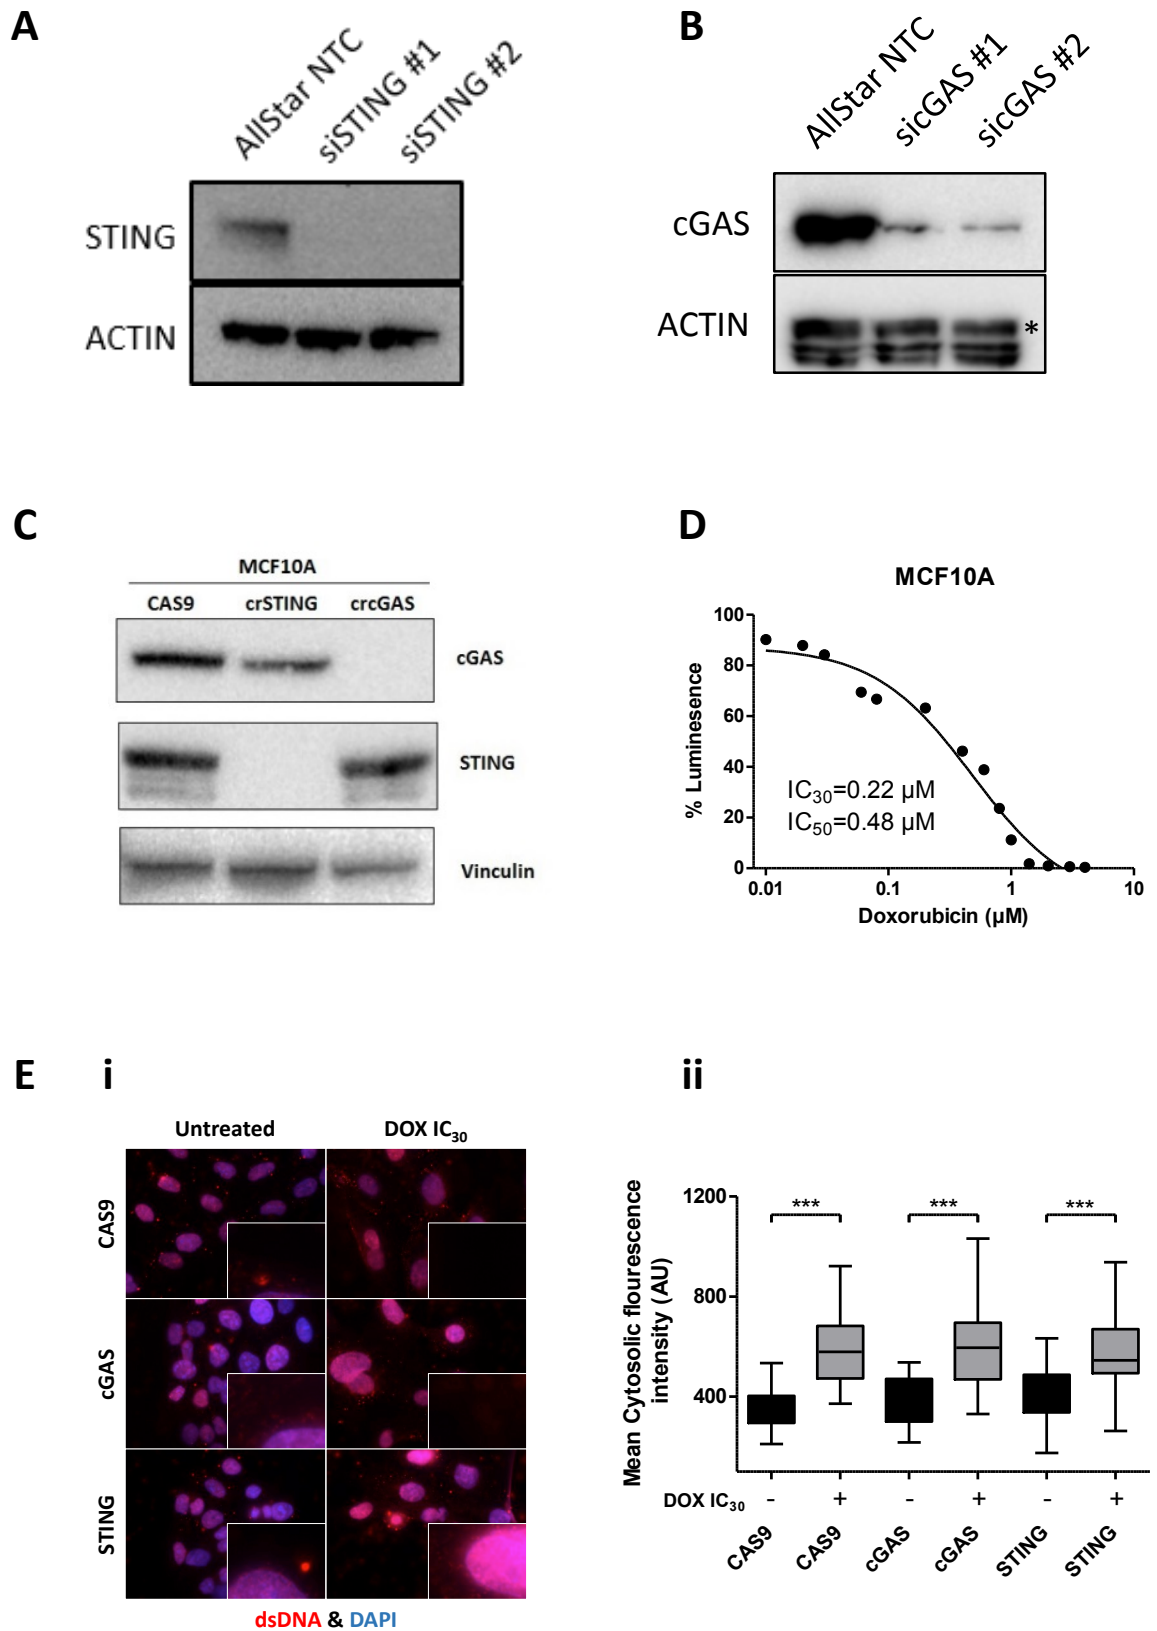

**Supplementary Figure 2.** A-B) Representative Western blots demonstrating typical depletion of STING (A) and cGAS (B) with the indicated siRNAs in HeLa cells. C)

Representative Western blots demonstrating depletion of cGAS and STING in CRISPR edited MCF10A cells. Control cells express Cas9 but no gene targeting guide RNA. D) 48 hour dose response of MCF10A cells with doxorubicin. Data represents mean response of three independent experiments. E) 9i) Representative images of immunofluorescent dsDNA staining in MCF10 cells, including cGAS and STING CRISPR knockout lines. (ii) Quantification of cytoplasmic dsDNA from three independent experiments represented in (Ei). Data represents mean cytoplasmic dsDNA fluorescence intensity from three independent experiments (\*\*\*)= $p \leq 0.001$ ).

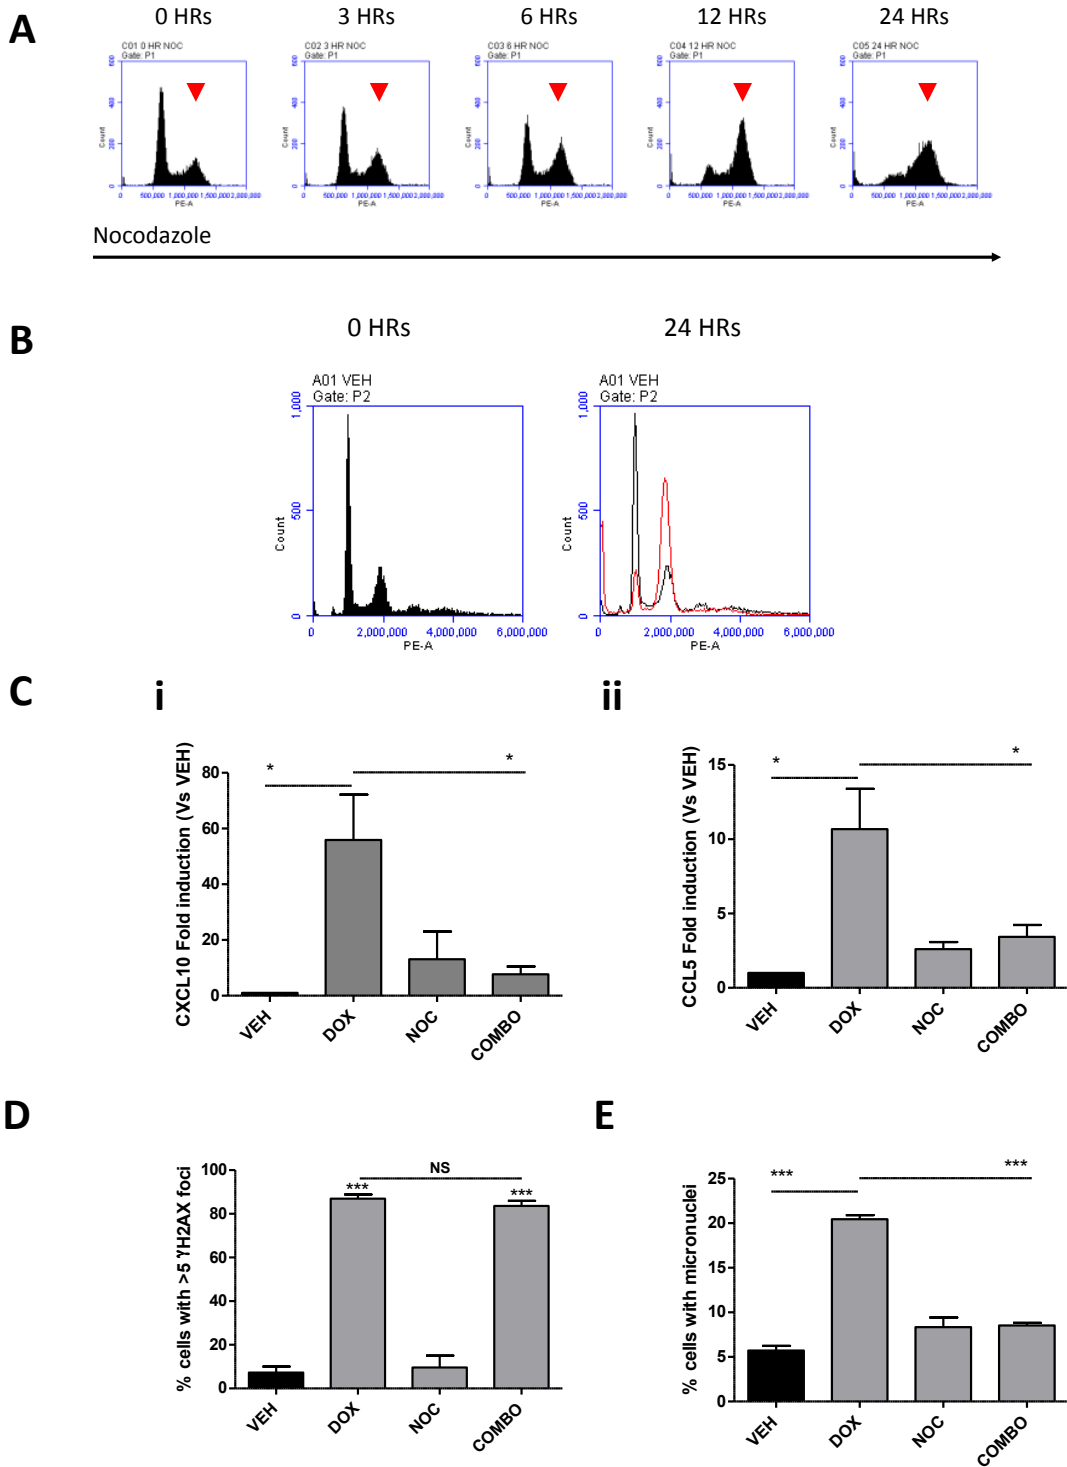

**Supplementary figure 3.** A) Representative FACS profiles of PI stained HeLa cells following Nocodazole treatment for the indicated time-points, demonstrating efficient G2/M block after which doxorubicin was added to cells for 48 hours to generate data shown in figure 3 B) Representative FACS profiles of PI stained T47D

cells following Nocodazole treatment for 24 hours, after which doxorubicin was added to generate data below, demonstrating efficient G2/M block. C) qRT-PCR mediated quantification of CXCL10 (i) and CCL5 (ii) in T47D cells treated with vehicle, doxorubicin (Dox), nocodazole (Noc), or combined dox and noc (Combo) for 48hrs. D) Confirmation of doxorubicin induced DNA damage in T47D cells treated as in C. E) Percentage of cells shown in C with micronuclei evaluated at 48 hrs timepoint. All quantitative data represents mean of 3 independent experiments +/- SEM (\*= $p \leq 0.05$ , \*\*= $p \leq 0.01$ , \*\*\*= $p \leq 0.001$ ).

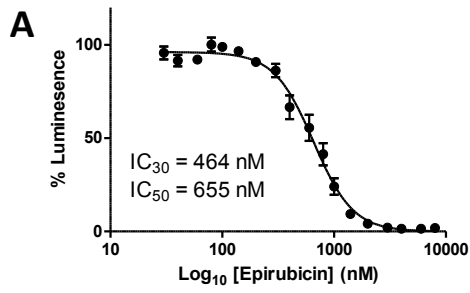

**B i**

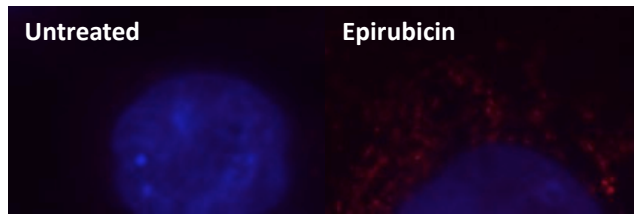

**ii**

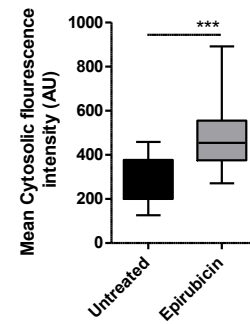

**C i**

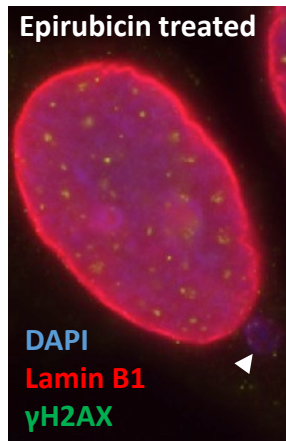

**ii**

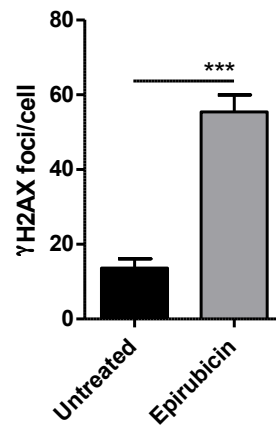

**iii**

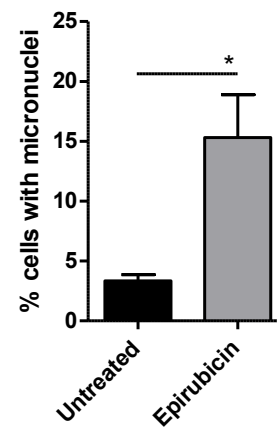

**D**

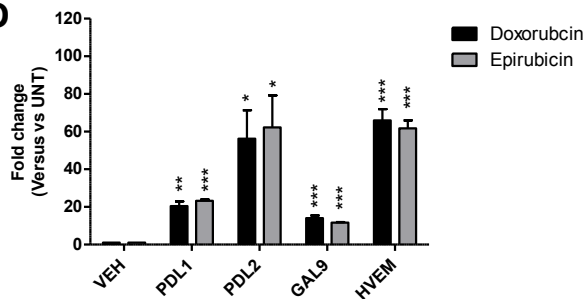

**E**

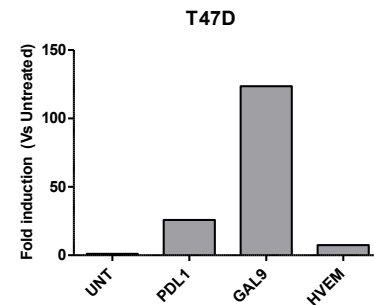

**Supplementary Figure 4.** A) 48 hour dose response in HeLa cells with epirubicin.

Data represents mean response of three independent experiments. B) (i).

Representative images of dsDNA staining in HeLa cells following 48-hr treatment with IC<sub>30</sub> epirubicin. (ii). Quantification of cytoplasmic dsDNA from three independent experiments represented i. C) i. Representative image of  $\gamma$ H2AX and Lamin B1 staining in epirubicin treated HeLa cell displaying a micronucleus. ii-iii. Quantification of  $\gamma$ H2AX and micronuclei positive cells following 48-hrs treatment with IC<sub>30</sub> epirubicin. D) Immune checkpoint gene expression following 48 hours treatment with IC<sub>30</sub> doxorubicin or epirubicin in MCF10A cells E) Immune checkpoint gene expression following 48 hours treatment with IC<sub>30</sub> epirubicin in T47D cells. PDL2 is not expressed in T47D cells and is therefore not shown. Data represents mean of 3 independent experiments +/- SEM (\*=p $\leq$ 0.05, \*\*=p $\leq$ 0.01, \*\*\*=p $\leq$ 0.001).
